# Supplementary material for: Thrombopoietin mimetic reduces mouse lung inflammation and fibrosis after radiation by attenuating activated endothelial phenotypes
Source: JCI journal article supplement (doi:10.1172/jci.insight.181330), 2024-11-07
Supplement: sd1 [file 1]

A

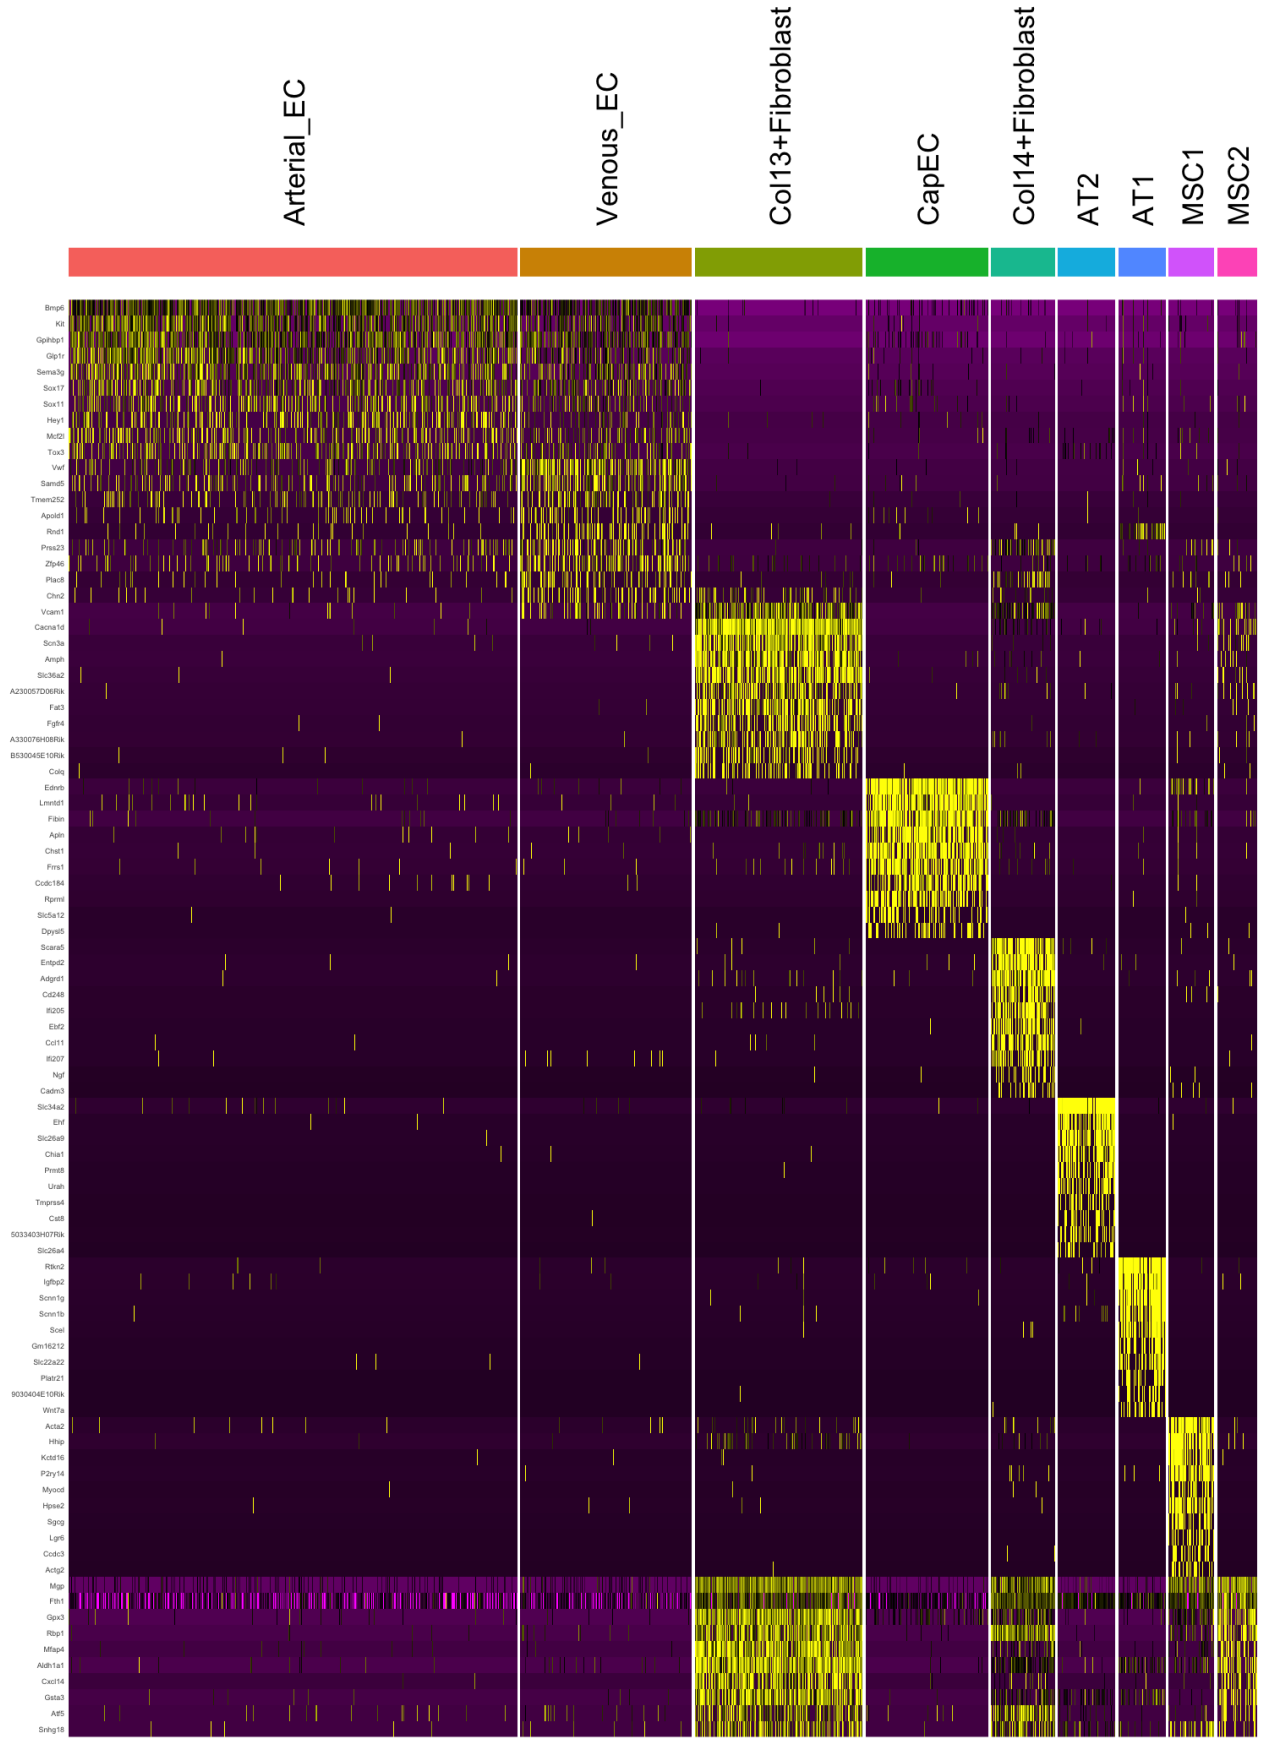

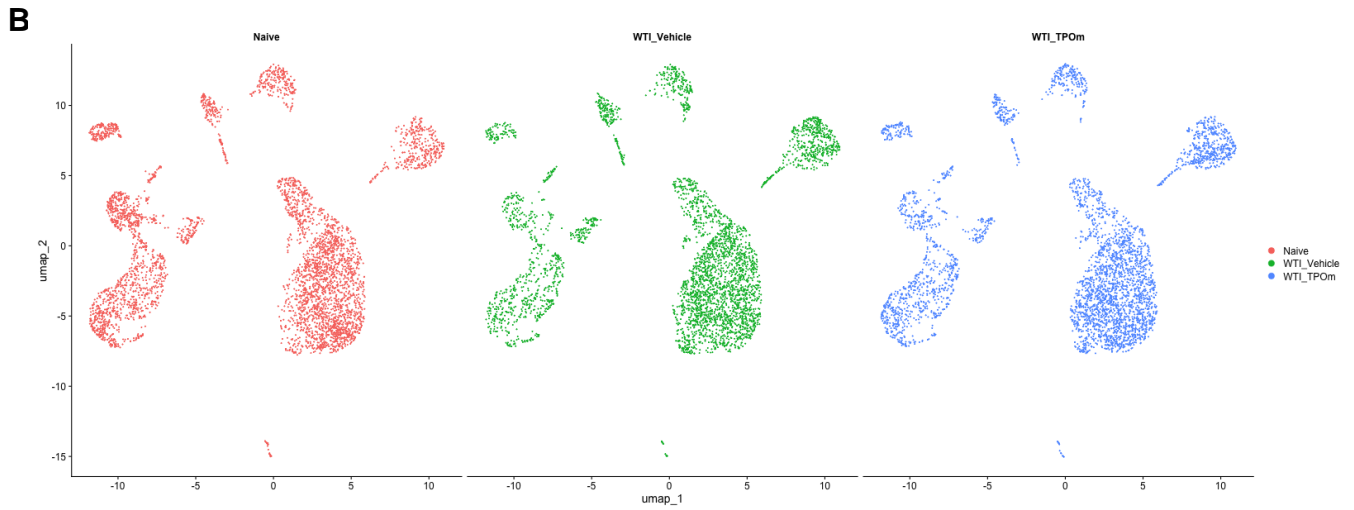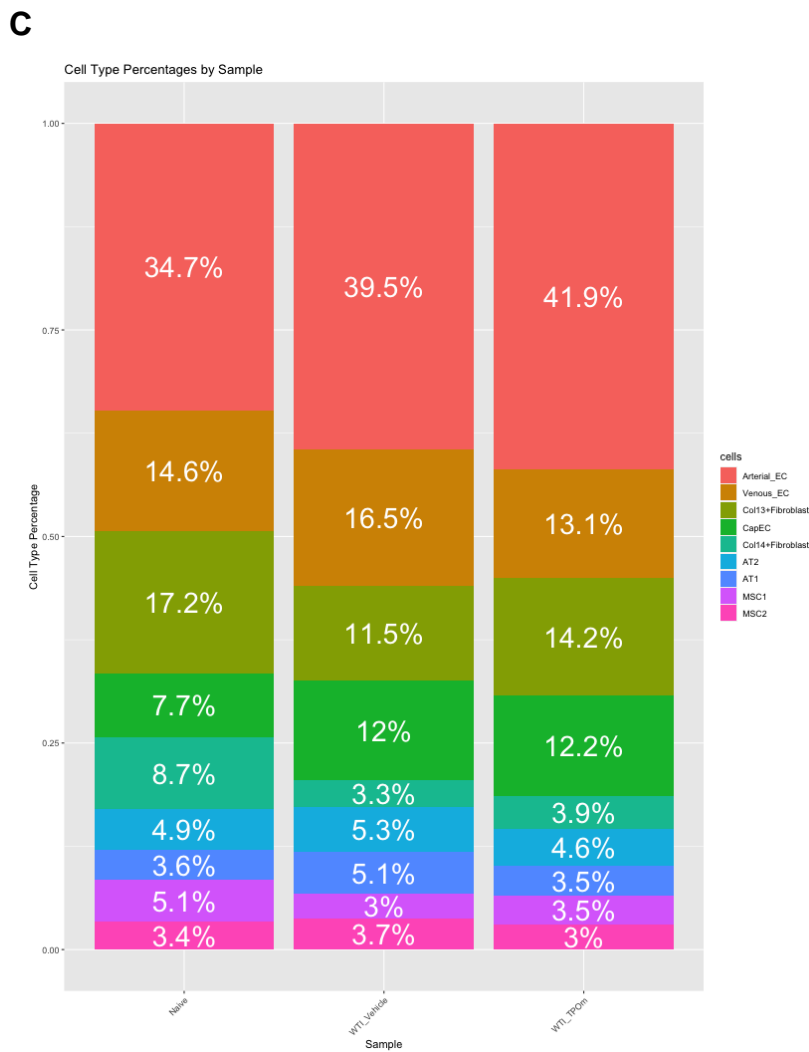

**Supplemental Figure 1. Overview of clusters in lung cells analyzed by scRNA-Seq and their distributions in each treatment group.** (A) Heatmap of the most differentially expressed genes of lung cells in the 9 different clusters. The color bars indicate gene expression level in log2 scale. (B) Two-dimensional UMAP projection split by treatment group. 4451 cells in naïve. 3925 cells in vehicle. 3862 cells in TPOM. (C) Each cluster's distribution by percentage iterated by treatment condition.

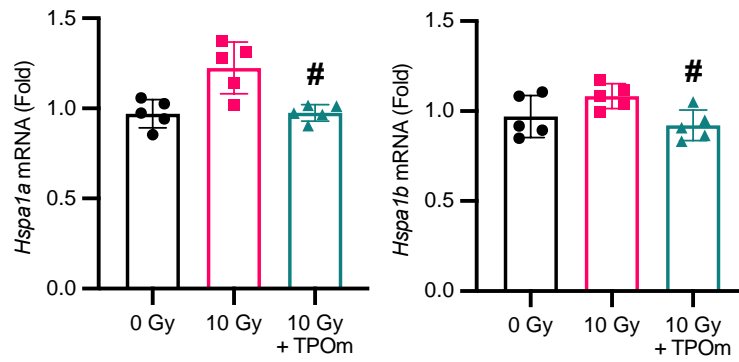

**Supplemental Figure 2. The mRNA expression of *Hspa1a* and *Hspa1b* in mouse PMVECs.** Mouse primary PMVECs were isolated from C57B/6J mouse and cultured. PMVECs from 0 Gy control and irradiated at 10 Gy 4 days after IR. The irradiated MPVECs were pretreated with PBS and TPOm 2 hours before IR. The mRNA expression of *Hspa1a* and *Hspa1b* was determined by qPCR. The results of qPCR analysis are normalized with *Hprt1* as an internal control and are expressed as fold change compared with the naive group. Data are shown as means  $\pm$  SD (n=5/group). \* $P < 0.05$  vs. 0 Gy and # $P < 0.05$  vs. 10 Gy. Data were analyzed using non-parametric methods, using a one-way ANOVA with Tukey test as post-hoc comparison.
